# Supplementary material
Source: publisher figshare collection journal article supplement (https://acs.figshare.com/ndownloader/files/3792472)
Supplement: Supplementary file 1 [file 3792472]

# Metabolomics Analysis and Biomarker Identification for Brains of Rats Exposed Subchronically to the Mixtures of Low-Dose Cadmium and Chlorpyrifos

Ming-Yuan Xu,<sup>§, ‡</sup> Ying-Jian Sun,<sup>§, †</sup> Pan Wang,<sup>§</sup> Hai-Yang Xu,<sup>§</sup> Li-Ping Chen,<sup>§</sup> Li Zhu,<sup>§</sup> Yi-Jun Wu<sup>\*, §</sup>

<sup>§</sup> Laboratory of Molecular Toxicology, State Key Laboratory for Integrated Management of Pest Insects and Rodents, Institute of Zoology, Chinese Academy of Sciences, 1-5 Beichenxi Road, Beijing 100101, PR China

<sup>†</sup> Department of Veterinary Medicine and Animal Science, Beijing University of Agriculture, Beijing 102206, PR China

<sup>‡</sup> University of Chinese Academy of Sciences, Beijing 100049, PR China

\* Author for correspondence: Yi-Jun Wu, Institute of Zoology, CAS, 1-5 Beichenxi Road, Beijing 100101, P. R. China

E-mail: [wuyj@ioz.ac.cn](mailto:wuyj@ioz.ac.cn); Tel: 86-10-64807251; Fax: 86-10-64807099.

## Table of Contents Graphic

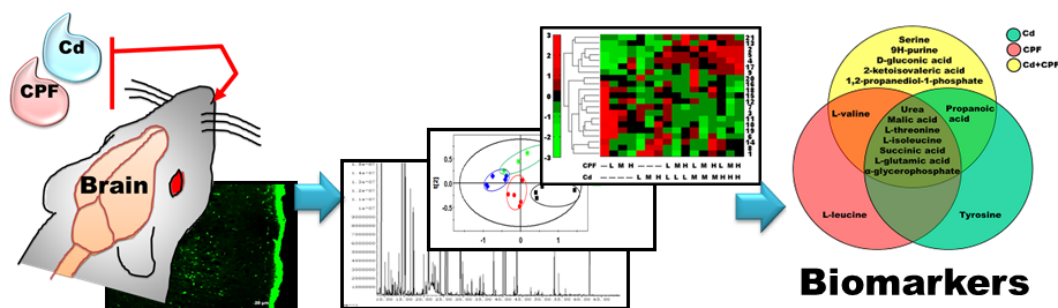

**Table S1. Experimental Design for Joint Effects of Cadmium (Cd, mg/kg) and Chlopyrifos (CPF, mg/kg)**

| Group        | Cadmium | Chlopyrifos |
|--------------|---------|-------------|
| Control      | 0       | 0           |
| Cd-L         | 0.7     | 0           |
| Cd-M         | 2       | 0           |
| Cd-H         | 6       | 0           |
| CPF-L        | 0       | 1.7         |
| CPF-M        | 0       | 5           |
| CPF-H        | 0       | 15          |
| Cd-L + CPF-L | 0.7     | 1.7         |
| Cd-L + CPF-M | 0.7     | 5           |
| Cd-L + CPF-H | 0.7     | 15          |
| Cd-M + CPF-L | 2       | 1.7         |
| Cd-M + CPF-M | 2       | 5           |
| Cd-M + CPF-H | 2       | 15          |
| Cd-H + CPF-L | 6       | 1.7         |
| Cd-H + CPF-M | 6       | 5           |
| Cd-H + CPF-H | 6       | 15          |

Abbreviations: Cd, cadmium; CPF, chlorpyrifos; L, low level; M, middle level; H, high level.

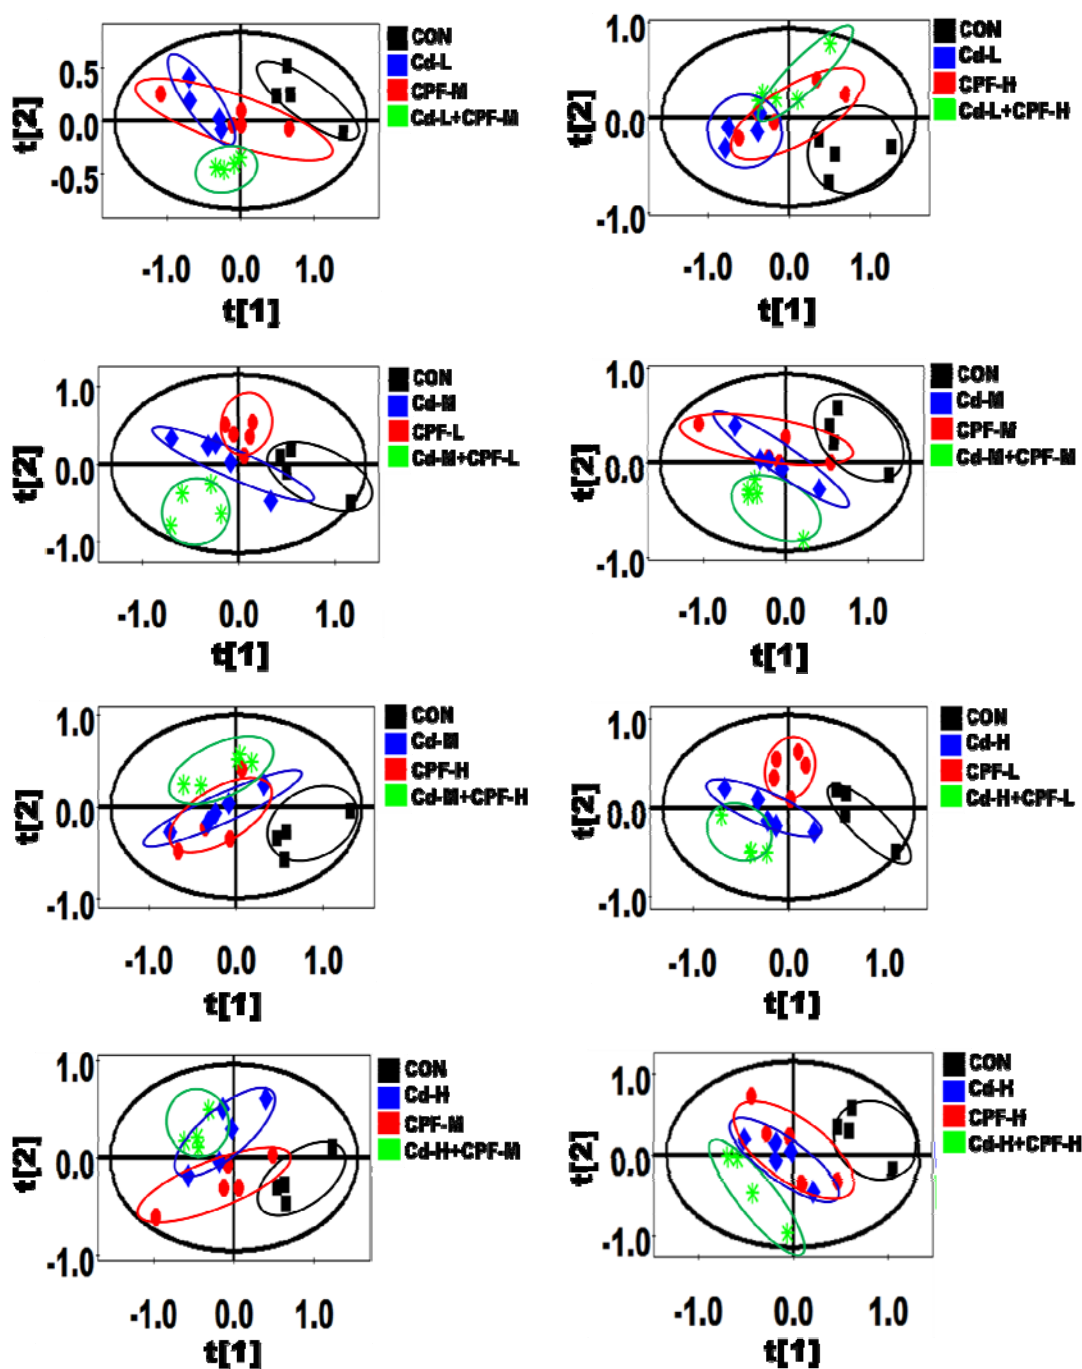

**Figure S1.** The PLS-DA score plots of rat brain metabolite profiles. Rats were administrated orally with Cd and CPF at respective doses of 0.7 and 1.7 mg/kg/day (L), 2 and 5 mg/kg/day (M), 6 and 15 mg/kg/day (H), and their mixtures, respectively, for 90 days. After that the brain metabonomics of rats were measured by GC-MS. Blank ellipse: control group; Blue ellipse: Cd-treated groups; Red ellipse: CPF-treated groups; Green ellipse: Cd plus CPF-treated groups. Abbreviations: CON, control; L, low dose; M, middle dose; H, high dose; Cd, cadmium; CPF, chlorpyrifos.
